# Supplementary material
Source: PubMed Central journal article supplement (PMC7158882)
Supplement: NIHMS1564730-supplement-Supplemental_Table_1_.pdf [file NIHMS1564730-supplement-Supplemental_Table_1_.pdf]

## Supplemental Material

**Supplemental Table 1:** Secondary antibodies used in this study

| <b>Antigen</b> | <b>Conjugation</b>                  | <b>Host</b> | <b>Reactivity</b> | <b>Company</b>            | <b>Catalog #</b> | <b>Dilution</b> |
|----------------|-------------------------------------|-------------|-------------------|---------------------------|------------------|-----------------|
| Donkey         | Alexa 647<br>Donkey<br>Anti-Goat    | Goat        | Alexa 647         | Jackson<br>ImmunoResearch | 705-605-003      | 1:1000          |
| Donkey         | Alexa 488<br>Donkey<br>Anti- Rabbit | Rabbit      | Alexa 488         | Jackson<br>ImmunoResearch | 711-545-152      | 1:1000          |
| Donkey         | Rhodamine<br>Donkey<br>Anti-Mouse   | Mouse       | Rhodamine         | Jackson<br>ImmunoResearch | 715-025-150      | 1:1000          |
